# Supplementary material
Source: publisher figshare collection journal article supplement (https://scielo.figshare.com/articles/dataset/_/5644372)
Supplement: Supplementary file 1 [file Table_1.xls]

## Sheet: Table_1
<b>Acid, Carbon number</b>	<b>Coconut oil (wt.%)</b>	<b>Animal fat (wt.%)</b>
Capric, C10	6	-
Lauric,C12	47	-
Myristic, C14	18	5
Palmitic, C16	9	29
Stearic, C18	3	15
Oleic, C18=	6	36
Linoleic, C18, 2=	2	1.5
Palmitoleic C16=	6	3
