# Supplementary material
Source: publisher figshare collection journal article supplement (https://scielo.figshare.com/articles/dataset/_/5644372)
Supplement: Supplementary file 2 [file Table_2.xls]

## Sheet: Table_2
<b>Fatty acids (%)</b>	<b>Sunflower oil</b>
Myristic C14:0	TRACE
Palmitic C16:0	6.18
Palmitoleic C16:1	TRACE
Stearic C18:0	3.41
Oleic C18:1	25.60
Ricinoleic C18:1:OH	TRACE
Linileic C18:2	64.80
Linilenic C18:3	TRACE
Arachidic C20:0	TRACE
Lignoceric C24:0	TRACE
