# Supplementary material
Source: publisher figshare collection journal article supplement (https://scielo.figshare.com/articles/dataset/_/5644372)
Supplement: Supplementary file 3 [file Table_3.xls]

## Sheet: Table_3
<b>Property</b>	<b>Viscosity</b>	<b>Viscosity index</b>	<b>Density</b>	<b>Acidity</b>	<b>Iodine value</b>	<b>Oxirane index</b>
Standard	D445<a href="#B17">17</a>	D2270<a href="#B18">18</a>	D1298<a href="#B19">19</a>	D664<a href="#B20">20</a>	AOCS Cd 1-25<a href="#B21">21</a>	D 1652<a href="#B22">22</a>
