# Supplementary material
Source: publisher figshare collection journal article supplement (https://scielo.figshare.com/articles/dataset/_/5644372)
Supplement: Supplementary file 4 [file Table_4.xls]

## Sheet: Table_4
<b></b>	<b>Ball</b>	<b>Disc</b>
Hardness (HV)	(570-750)	(190-210)
Dimensions	Diameter = 6<strong>.</strong>0 mm	Diameter = 10<strong>.</strong>0 mmThickness = 3<strong>.</strong>0 mm
RoughnessRa (µm)	0<strong>.</strong>05	0<strong>.</strong>02
