# Supplementary material
Source: publisher figshare collection journal article supplement (https://scielo.figshare.com/articles/dataset/_/5644372)
Supplement: Supplementary file 5 [file Table_5.xls]

## Sheet: Table_5
<b>Fe</b>	<b>C</b>	<b>Mn</b>	<b>Cr</b>	<b>S</b>	<b>Si</b>	<b>Al</b>	<b>Ca</b>
Bal	0.900	0.413	1.567	0.127	0.546	0.105	0.154
