# Supplementary material
Source: publisher figshare collection journal article supplement (https://scielo.figshare.com/articles/dataset/_/5644372)
Supplement: Supplementary file 6 [file Table_6.xls]

## Sheet: Table_6
<b>Analysis</b>	<b>Density (g/cm<sup>3</sup>)</b>	<b>Acidity (mg KOH/g)</b>	<b>Iodine index (g I<sub>2</sub>/100g fat)</b>	<b>Oxirane index (%)m/m</b>	<b>Viscosity (cSt) at 40 ºC and 100ºC</b>	<b>ViscosityIndex</b>
OGC	0<strong>.</strong>9183	±0<strong>.</strong>08	119<strong>.</strong>77	-	27/11<strong>.</strong>5	147
OGEAF	0<strong>.</strong>937	±0<strong>.</strong>18	1<strong>.</strong>3	4<strong>.</strong>2%	70<strong>.</strong>23/13<strong>.</strong>3	155
