# Supplementary material
Source: publisher figshare collection journal article supplement (https://scielo.figshare.com/articles/dataset/_/5644372)
Supplement: Supplementary file 7 [file Table_7.xls]

## Sheet: Table_7
<b>Emulsion O/W</b>
Epoxidized oil	Surfactant	Average coefficient of friction
5%	1%	0<strong>.</strong>088
	2<strong>.</strong>5%	0<strong>.</strong>091
	5%	0<strong>.</strong>092
10%	1%	0<strong>.</strong>089
	2<strong>.</strong>5%	0<strong>.</strong>092
	5%	0<strong>.</strong>097
15%	1%	0<strong>.</strong>091
	2<strong>.</strong>5%	0<strong>.</strong>093
	5%	0<strong>.</strong>098
20%	1%	0<strong>.</strong>092
	2<strong>.</strong>5%	0<strong>.</strong>094
	5%	0<strong>.</strong>099
25%	1%	0<strong>.</strong>096
	2.5%	0<strong>.</strong>096
	5%	0<strong>.</strong>102
